# Supplementary material for: Highly efficient tandem white organic light-emitting diodes based upon C60/NaT4 organic heterojunction as charge generation layer
Source: Royal Society of Chemistry journal article supplement (doi:10.1039/c2jm30557g), 2012-01-01
Supplement: c2jm30557g.pdf [file c2jm30557g.pdf]

# ***Journal of Materials Chemistry***

## **Supporting Information**

**For**

**Highly efficient tandem white organic light-emitting diodes  
based upon C<sub>60</sub>/NaT4 organic heterojunction as charge  
generation layer**

**Yonghua Chen, Hongkun Tian, Jiangshan Chen, Yanhou Geng, Donghang Yan,**

**Lixiang Wang and Dongge Ma \***

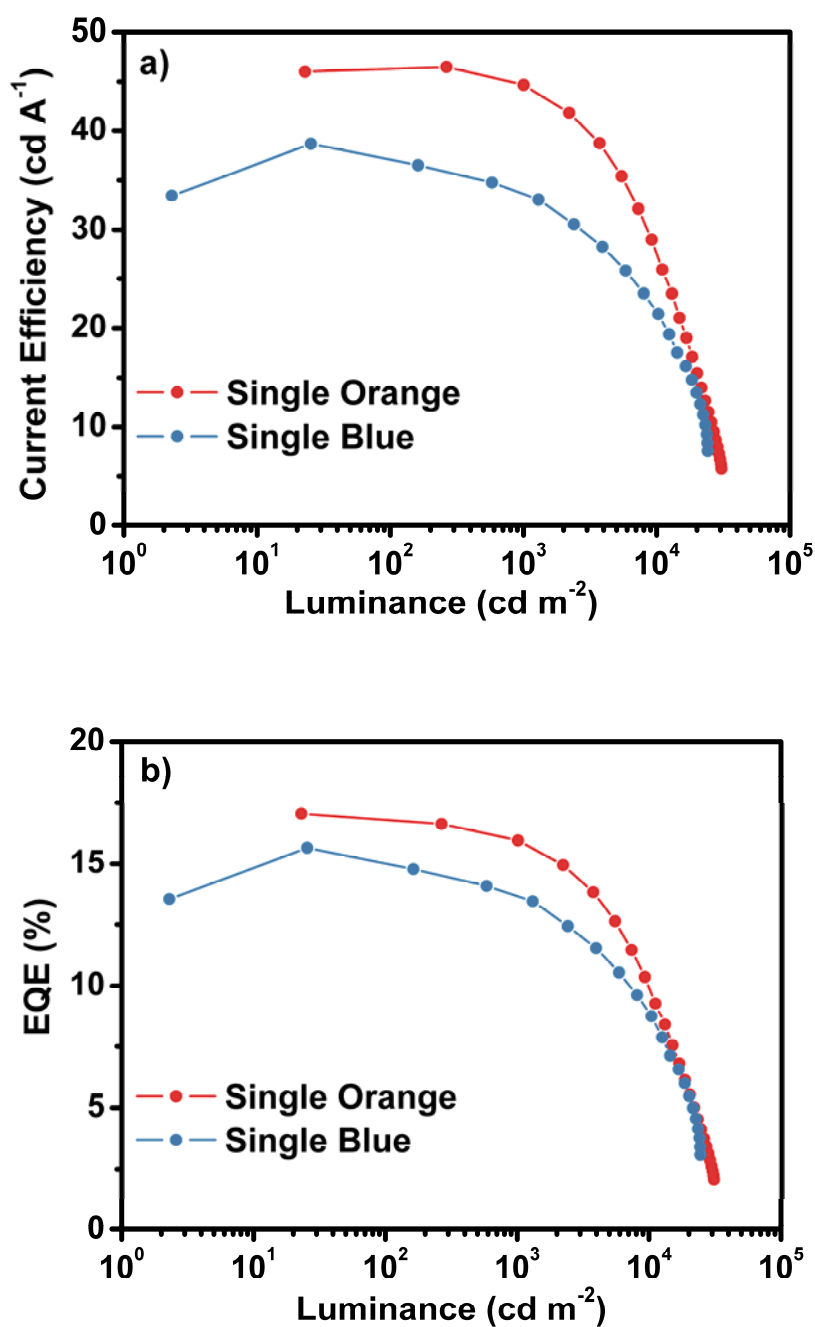

**Fig. S1.** a) Current and b) EQE versus luminance characteristics of single orange and blue devices. The single orange device structure is: ITO/TCTA: MoO<sub>3</sub> (40 nm)/TCTA (10 nm)/TCTA: (fbi)<sub>2</sub>Ir(acac) (8 wt%) (30 nm)/TPBi (10 nm)/TPBi: Li<sub>2</sub>CO<sub>3</sub> (30 nm)/LiF (1 nm)/Al (120 nm). The single blue device structure is: ITO/TCTA: MoO<sub>3</sub> (70 nm)/TCTA (10 nm)/TCTA: FIrpic (8 wt%) (20 nm)/TPBi (10 nm)/TPBi: Li<sub>2</sub>CO<sub>3</sub> (30 nm)/LiF (1 nm)/Al (120 nm).
